# Supplementary material
Source: Springer Nature journal article supplement (https://www.springermedizin.de/resource/supplementary/12933_2013_702_MOESM1_ESM.pdf/9538768)

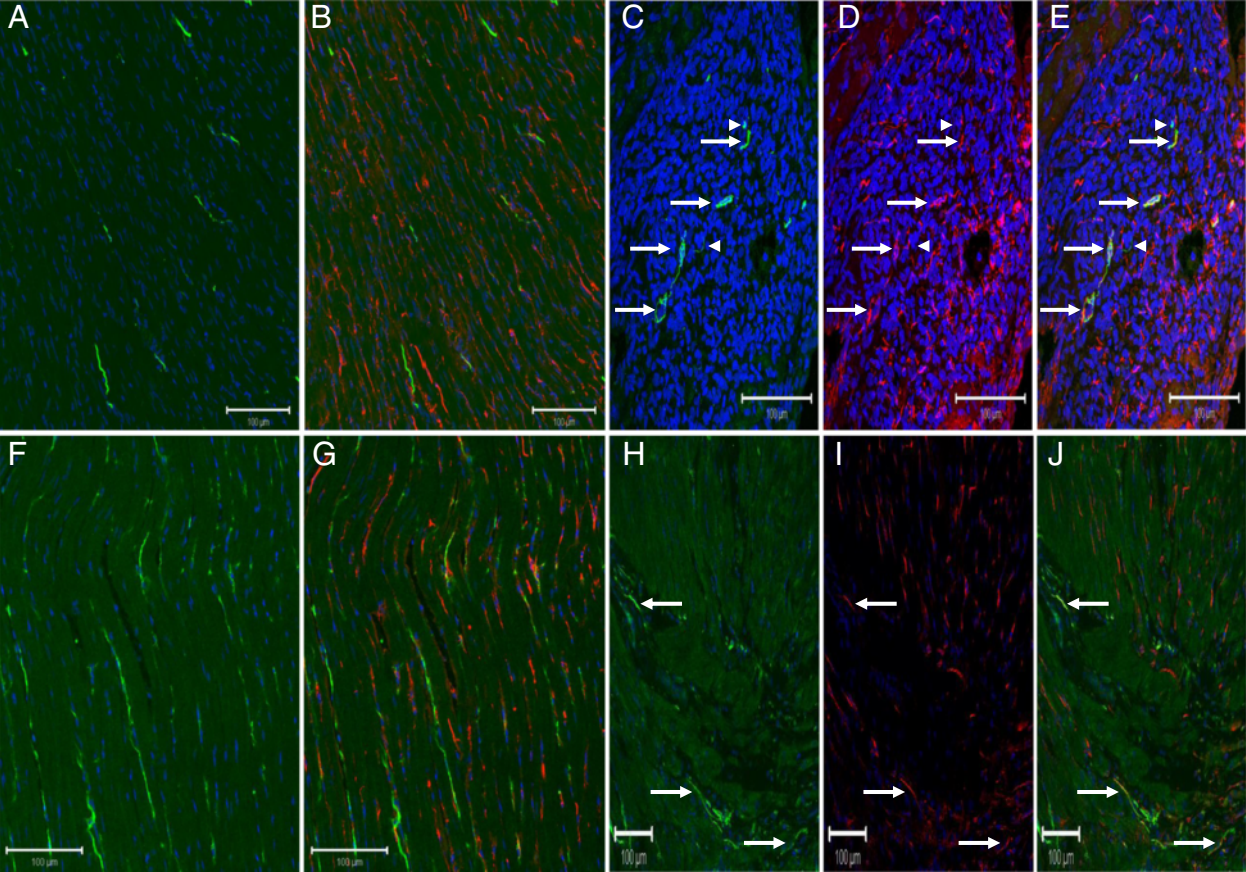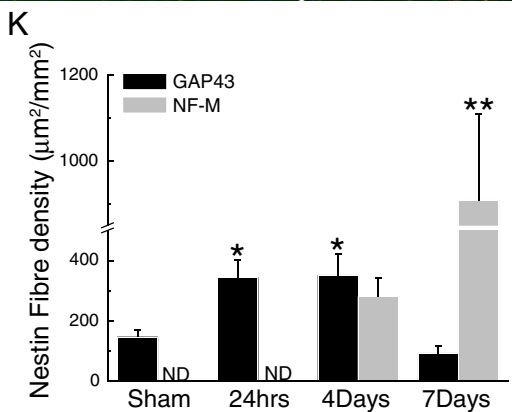

Supplement: MOESM1 [file 9538768]
